# Supplementary figures and images for: Circulating CD137+ T Cell Levels Are Correlated with Response to Pembrolizumab Treatment in Advanced Head and Neck Cancer Patients
Source: MDPI journal article supplement (doi:10.3390/ijms24087114), 2023-04-12

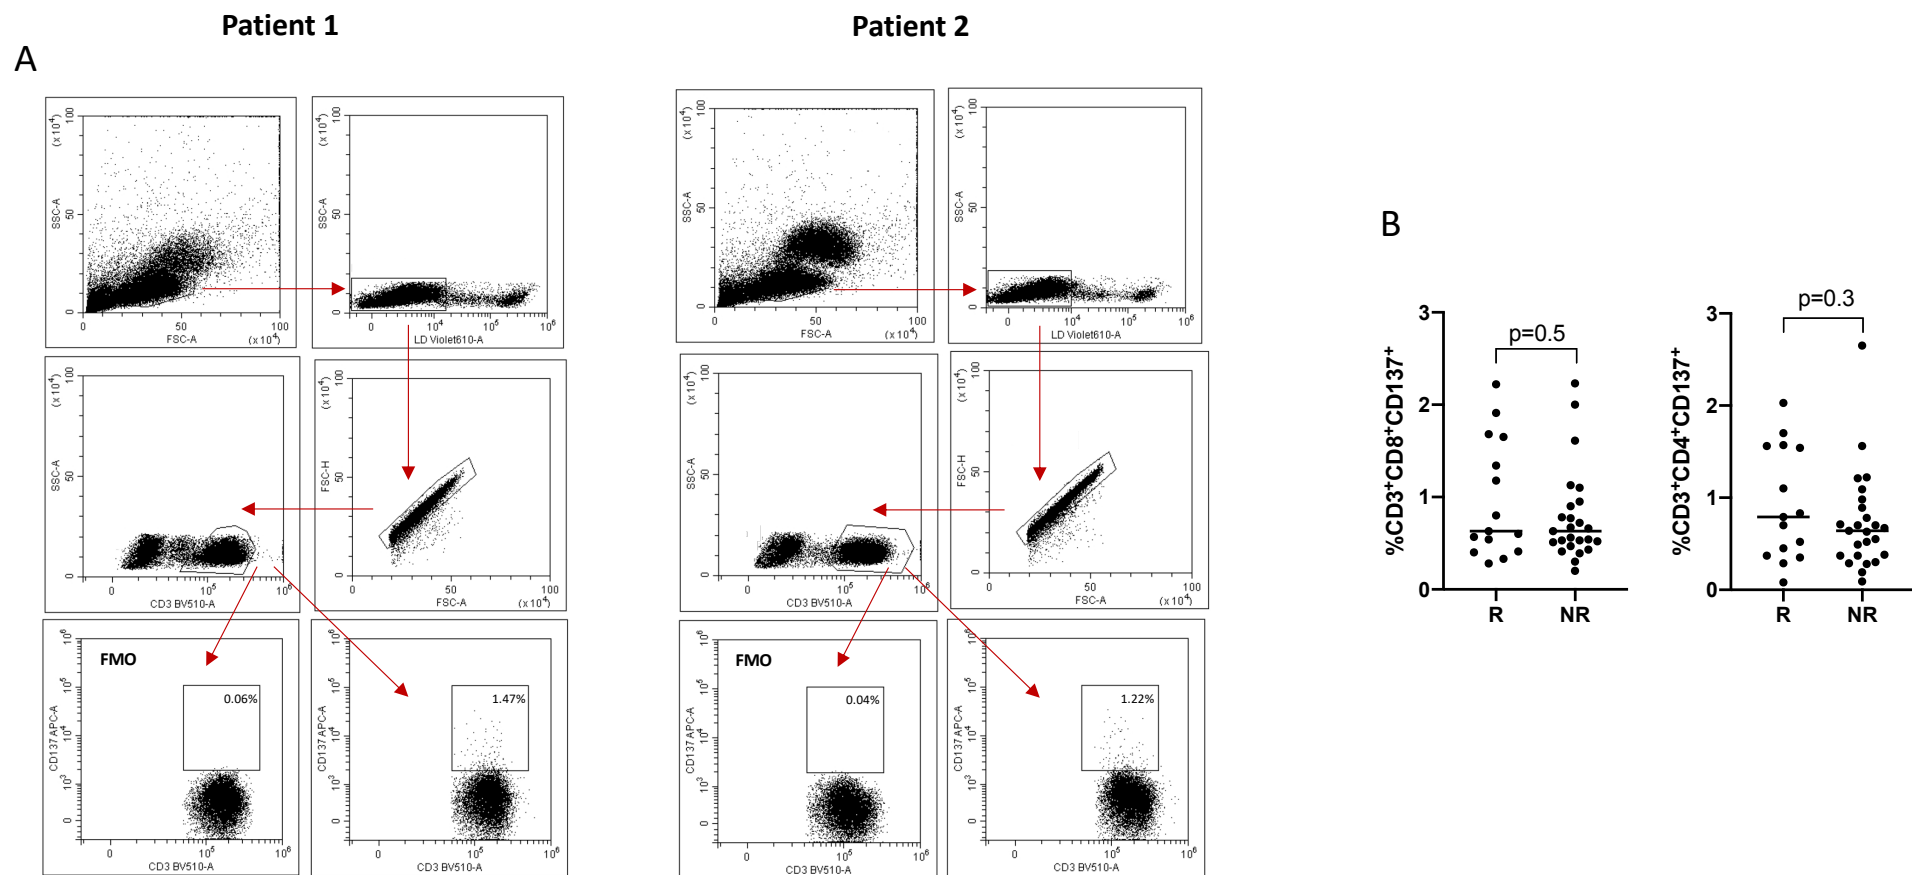

Supplement: s1 [file s1]
